# Supplementary material
Source: Royal Society of Chemistry journal article supplement (doi:10.1039/d6cy00012f)
Supplement: d6cy00012f1.pdf [file d6cy00012f1.pdf]

Supporting information for

**Insights into the influence of various impurities on the stability of Cu/SiO<sub>2</sub> catalyst for the hydrogenation of dimethyl oxalate to ethylene glycol**

Suxian Wu <sup>a, b, c, #</sup>, Yajun Li <sup>b, #</sup>, Zhihuan Qiu <sup>c, \*</sup>, Jinglin Yang <sup>c</sup>, Yuefei Wang <sup>a, b, c</sup>,  
Tiantian Xiao <sup>b, e</sup>, Jing Lv <sup>b, c</sup>, Maoshuai Li <sup>b, c</sup>, Xiaojun Bao <sup>a, d</sup>, Xinbin Ma <sup>b, e</sup>, Yue  
Wang <sup>b, c, \*</sup>

<sup>a</sup> College of Chemical Engineering, Fuzhou University, Fuzhou 350002, China

<sup>b</sup> Key Laboratory for Green Chemical Technology of Ministry of Education, Collaborative Innovation Center of Chemical Science and Engineering, School of Chemical Engineering and Technology, Tianjin University, Tianjin 300072, China

<sup>c</sup> Zhejiang Institute of Tianjin University, Ningbo Key Laboratory of Green Petrochemical Carbon Emission Reduction Technology and Equipment, Ningbo, Zhejiang 315200, China

<sup>d</sup> Qingyuan Innovation Laboratory, Quanzhou 362801, China

<sup>e</sup> School of Chemical Engineering, Xinjiang University, Urumgi 830017, China

\* Corresponding author's email: qiuzhihuan@zitju.cn, yuewang@tju.edu.cn

# S. Wu and Y. Li are equally contributed to this work.

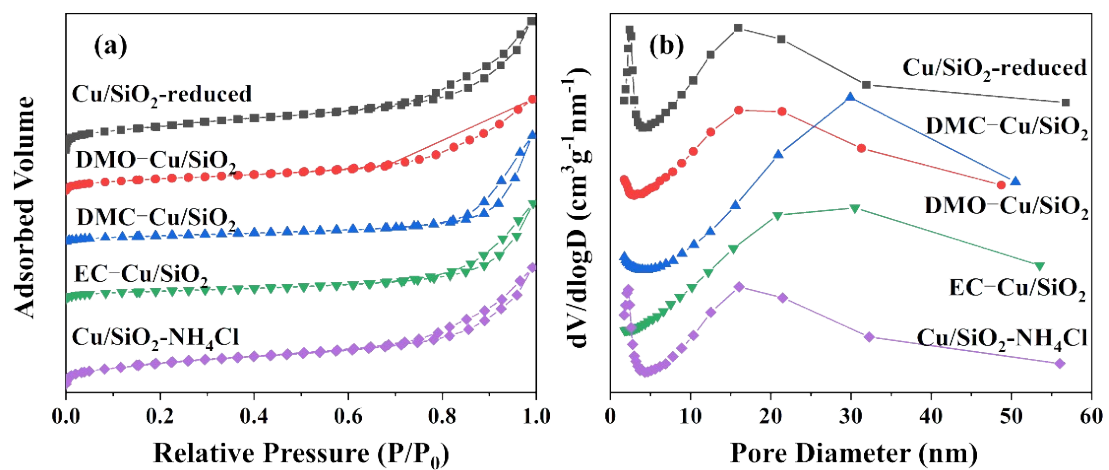

Figure S1. (a) N<sub>2</sub> adsorption-desorption isotherms and (b) pore size distribution curves of the reduced and used Cu/SiO<sub>2</sub> catalysts.

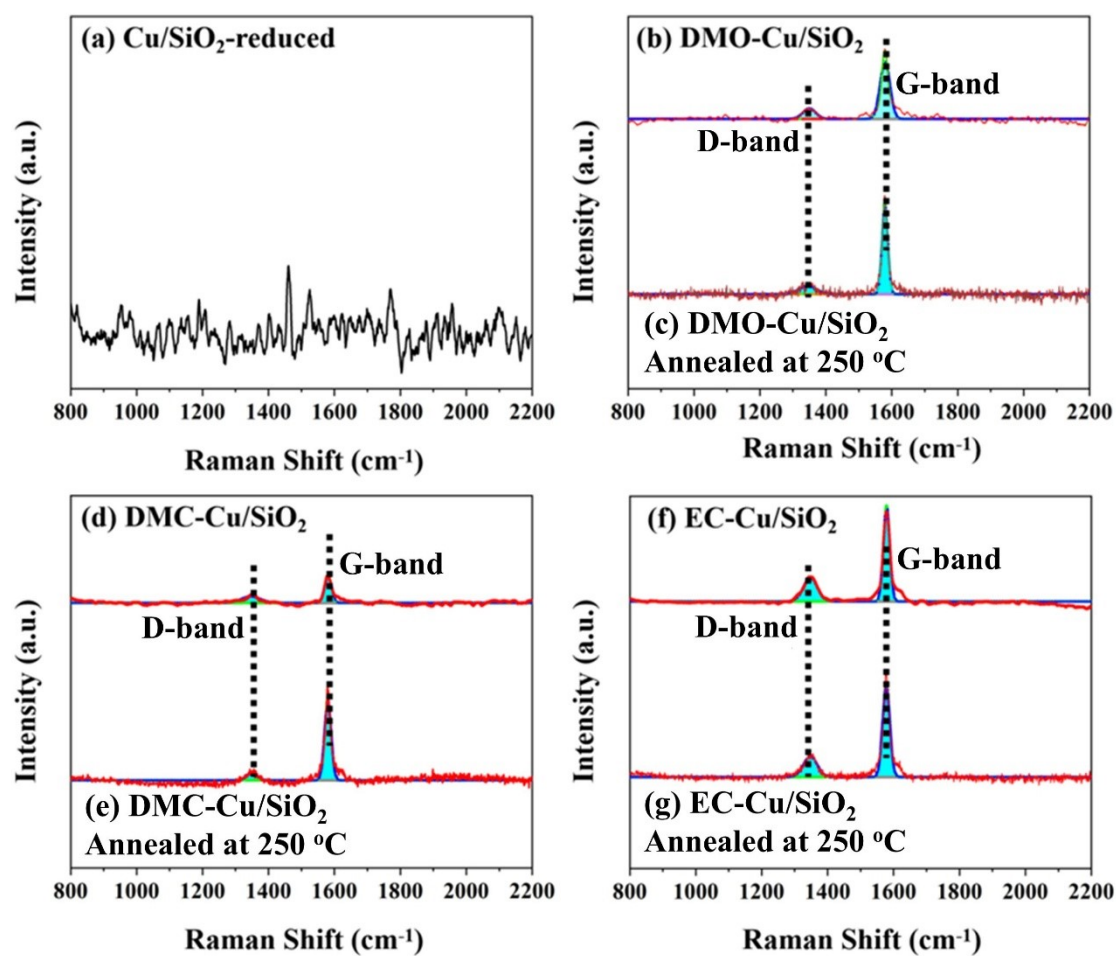

Figure S2. Raman spectra of the reduced and used Cu/SiO<sub>2</sub> catalysts with different feedstocks. (a) reduced, (b, d, f) after reaction, (c, e, g) after reaction and annealed at 250 °C.

Table S1. Actual weight loss of the used Cu/SiO<sub>2</sub> catalysts calculated from TG analysis.

| Catalyst                                | Total loss (%) | Soft coke (%) | Heavy coke (%) |
|-----------------------------------------|----------------|---------------|----------------|
| DMO-Cu/SiO <sub>2</sub>                 | 2.79           | 2.19          | 0.60           |
| DMC-Cu/SiO <sub>2</sub>                 | 4.44           | 3.33          | 1.11           |
| EC-Cu/SiO <sub>2</sub>                  | 7.13           | 6.42          | 0.71           |
| Cu/SiO <sub>2</sub> -NH <sub>4</sub> Cl | 1.97           | 1.35          | 0.62           |

Table S2.  $I_D/I_G$  values derived from Raman spectra of the used Cu/SiO<sub>2</sub> catalysts with different feedstocks.

|                              | DMO-Cu/SiO <sub>2</sub> | DMC-Cu/SiO <sub>2</sub> | EC-Cu/SiO <sub>2</sub> |
|------------------------------|-------------------------|-------------------------|------------------------|
| $I_D/I_G$ (before annealing) | 0.18                    | 0.24                    | 0.26                   |
| $I_D/I_G$ (after annealing)  | 0.09                    | 0.16                    | 0.22                   |

Table S3. Main carbonaceous deposit species in the used Cu/SiO<sub>2</sub> catalysts and the properties.

| Name                             | Structural formula                                                                  | Molecular formula                             | Relative molecular mass | Boiling point (°C) |
|----------------------------------|-------------------------------------------------------------------------------------|-----------------------------------------------|-------------------------|--------------------|
| n-heptane                        | 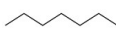   | C <sub>7</sub> H <sub>16</sub>                | 100.2                   | 98                 |
| toluene                          |    | C <sub>7</sub> H <sub>8</sub>                 | 92.1                    | 111                |
| p-xylene                         |    | C <sub>8</sub> H <sub>10</sub>                | 106.2                   | 138                |
| 1,2,4-trimethylbenzene           |    | C <sub>9</sub> H <sub>12</sub>                | 120.2                   | 168                |
| diethylene glycol dimethyl ether |    | C <sub>6</sub> H <sub>14</sub> O <sub>3</sub> | 134.2                   | 159                |
| 1,2-dimethyl-3-ethylbenzene      |   | C <sub>10</sub> H <sub>14</sub>               | 134.2                   | 194                |
| 1,4-butanediol                   |  | C <sub>4</sub> H <sub>10</sub> O <sub>2</sub> | 90.1                    | 228                |
| 1,5-pentanediol                  |  | C <sub>5</sub> H <sub>12</sub> O <sub>2</sub> | 104.1                   | 239                |
| 3-phenylpropanol                 |  | C <sub>9</sub> H <sub>12</sub> O              | 136.2                   | 238                |
| trans-cinnamaldehyde             |  | C <sub>9</sub> H <sub>8</sub> O               | 132.2                   | 250                |
| 3,4-xylylaldehyde                |  | C <sub>10</sub> H <sub>12</sub> O             | 148.2                   | 245                |
| cinnamyl alcohol                 |  | C <sub>9</sub> H <sub>10</sub> O              | 134.2                   | 250                |
| 4-tert-butylphenol               |  | C <sub>10</sub> H <sub>14</sub> O             | 150.2                   | 238                |
| 2,4-di-tert-butylphenol          |  | C <sub>14</sub> H <sub>22</sub> O             | 206.3                   | 265                |

Table S3. Main carbonaceous deposit species in the used Cu/SiO<sub>2</sub> catalysts and the

properties (continued).

| Name                          | Structural formula                                                                 | Molecular formula                                              | Relative molecular mass | Boiling point (°C) |
|-------------------------------|------------------------------------------------------------------------------------|----------------------------------------------------------------|-------------------------|--------------------|
| 18-crown-6                    |   | C <sub>12</sub> H <sub>24</sub> O <sub>6</sub>                 | 264.3                   | 395                |
| decamethylcyclopentasiloxane  |   | C <sub>10</sub> H <sub>30</sub> O <sub>5</sub> Si <sub>5</sub> | 370.8                   | 90                 |
| dodecane                      |   | C <sub>12</sub> H <sub>26</sub>                                | 170.3                   | 215                |
| dodecamethylcyclohexasiloxane |  | C <sub>12</sub> H <sub>36</sub> O <sub>6</sub> Si <sub>6</sub> | 444.9                   | 245                |
